# Supplementary material
Source: Copernicus journal article supplement (doi:10.5194/gchron-8-351-2026)
Supplement: Supplementary file 1 [file gchron-8-351-2026-supplement.pdf]

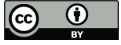

*Supplement of*

**Atmospheric  $^{10}\text{Be}$  from Talos Dome (East Antarctic) ice core records  
geomagnetic dipole intensity from 170 to 270 ka BP**

**Alexis Lamothe et al.**

*Correspondence to:* Alexis Lamothe (alexis.lamothe@nju.edu.cn)

The copyright of individual parts of the supplement might differ from the article licence.

**Figure S1: rolling averages**

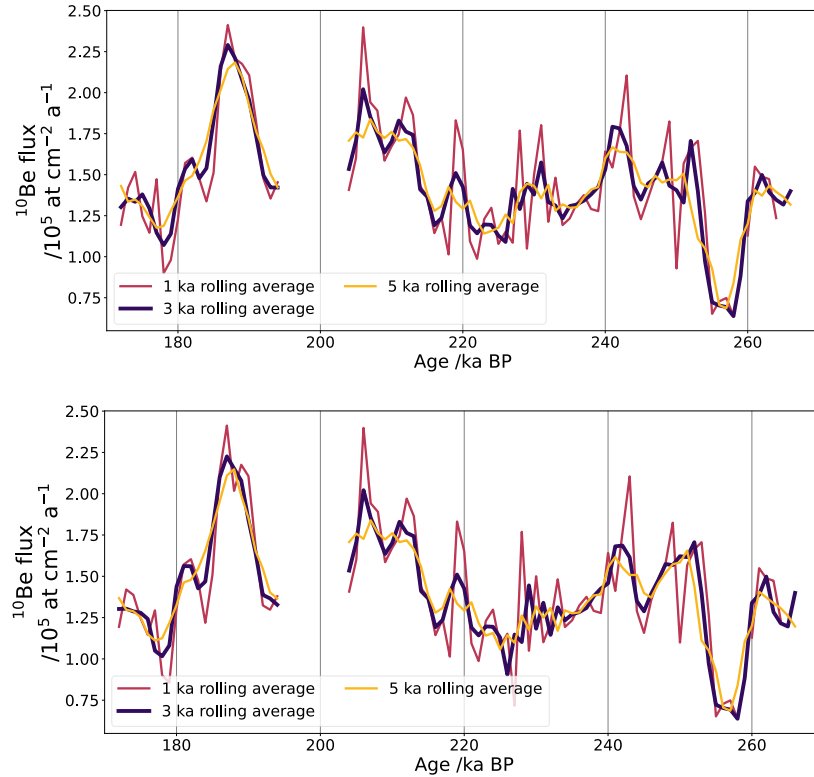

Comparison of three different rolling averages for  $^{10}\text{Be}$  flux ( $/10^5 \text{ at cm}^{-2} \text{ a}^{-1}$ ): with 1 ka (red), 3 ka (purple), 5 ka (orange)

**5 Figure S2: median and mean averages**

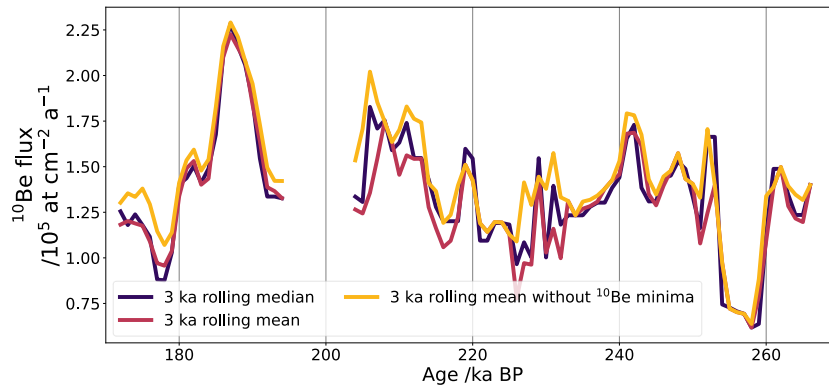

Comparison of three different rolling averages for  $^{10}\text{Be}$  flux ( $/10^5 \text{ at cm}^{-2} \text{ a}^{-1}$ ): with 3 ka rolling mean (red), 3 ka rolling median (purple), and a 3 ka rolling mean without the  $^{10}\text{Be}$  minima (orange) in order to investigate the influence of minima on the flux variations.

10 **Figure S3: comparison of sodium and  $^{10}\text{Be}$  concentrations**

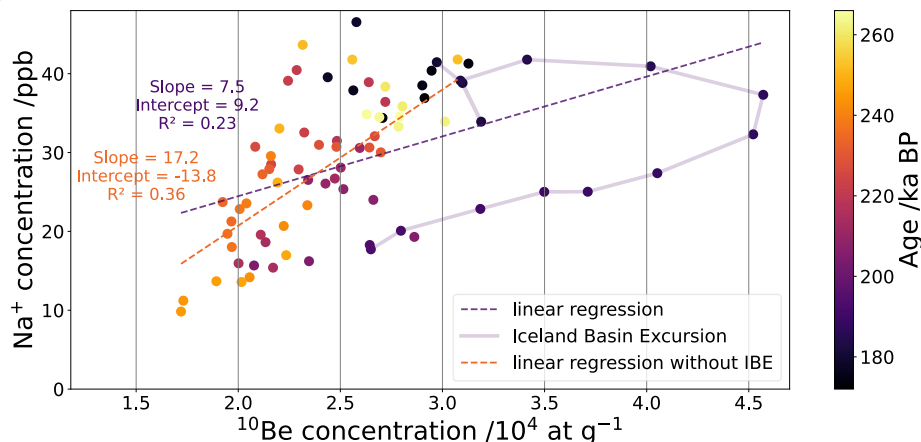

We investigate the contribution of climate variations on  $^{10}\text{Be}$  concentration comparing  $\text{Na}^+$  concentration ( $\text{ppb} = \text{ng g}^{-1}$ ) with  $^{10}\text{Be}$  concentration ( $/10^4 \text{ at g}^{-1}$ ). Each dot represent one year mean average. The Iceland Basin excursions is easily identifiable (purple dots and curve) which affects the linear regression (dashed lines) between  $\text{Na}^+$  and  $^{10}\text{Be}$  concentrations.

15 **Figure S4: correlation between MD05-2920 authigenic  $^{10}\text{Be}/^9\text{Be}$  and TALDICE  $^{10}\text{Be}$  flux records**

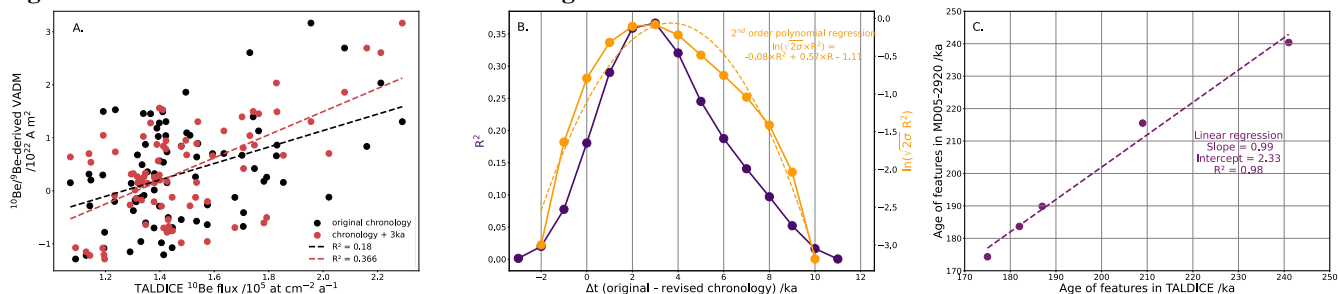

A. Comparison of the authigenic  $^{10}\text{Be}/^9\text{Be}$ -based VADM ( $/10^{22} \text{ A m}^2$ ) from Simon et al., (2016) and TALDICE  $^{10}\text{Be}$  flux ( $/10^5 \text{ at cm}^{-2} \text{ a}^{-1}$ ) in the case of original oceanic chronology (black) or shifted 3 ka earlier (red). B. Cross-correlogram displaying  $R^2$  (from the same variables as in Fig. A, purple) depending on fixed revision on the oceanic chronology (relative  $\Delta t = \text{original} - \text{revised chronology}$ , /ka). The correlation curve exhibits a Gaussian-like shape, with its maximum corresponding to the best temporal alignment between the two archives. The logarithm of the correlation ( $\ln(\sqrt{2\sigma} R^2)$ , orange dots) was fitted by a second-order polynomial (dashed orange line) to approximate a Gaussian function and determine the mean of the distribution ( $\mu$ ), representing the optimal offset between the records. C. Age-age relationship for the same 5 distinguishable features in MD05-2920 (y axis) and TALDICE (x axis) as noted in Figure 5.

25 **Table S1: list of studies reporting at the IBE, PFE alone, and IBE, PFE, and ME. The confusion between PFE and ME events are clarified in section 2.2.**

| Excursions recorded | Latitude | Longitude | Type of archive | Archive name | Source |
|---------------------|----------|-----------|-----------------|--------------|--------|
|---------------------|----------|-----------|-----------------|--------------|--------|

|            |        |         |          |                                                          |                                                                                                      |
|------------|--------|---------|----------|----------------------------------------------------------|------------------------------------------------------------------------------------------------------|
| IBE        | 43.48  | -112.53 | Volcano  | site E at the Idaho National Engineering Laboratory INEL | Champion et al., 1988                                                                                |
| PFE        | 43.78  | -121.53 | Sediment | Pringle falls                                            | Herrero-Bervera et al.1989; 1994                                                                     |
| IBE PFE ME | -1.64  | 159.22  | Sediment | Ontong Java plateau ERDC 113p                            | Taux & Wu, 1990                                                                                      |
| IBE PFE ME | 0      | 155.87  | Sediment | Ontong Java plateau ERDC 89p                             | Taux & Wu, 1990                                                                                      |
| IBE        | -3.09  | -110.53 | Sediment | ODP Sites 848                                            | Valet & Meynadier, 1993                                                                              |
| IBE        | 2.99   | -110.5  | Sediment | ODP Sites 851                                            | Valet & Meynadier, 1993                                                                              |
| IBE        | 1.01   | 136.96  | Sediment | West Caroline Basin, western equatorial Pacific NP5      | Yamazaki & Ioka, 1994                                                                                |
| IBE        | 2      | 135     | Sediment | West Caroline Basin, western equatorial Pacific NGC16    | Yamazaki & Ioka, 1994                                                                                |
| IBE        | 4.13   | 136.27  | Sediment | West Caroline Basin, western equatorial Pacific NGC29    | Yamazaki & Ioka, 1994                                                                                |
| IBE        | 2      | 138.01  | Sediment | West Caroline Basin, western equatorial Pacific NP7      | Yamazaki & Ioka, 1994                                                                                |
| IBE        | 3.8    | 141.48  | Sediment | NP35                                                     | Yamazakia et al., 1995                                                                               |
| IBE        | 1.22   | 160.57  | Sediment | NGC36                                                    | Yamazakia et al., 1995                                                                               |
| IBE        | -14.99 | 175.17  | Sediment | NGC38                                                    | Yamazakia et al., 1995                                                                               |
| IBE        | 43.52  | -30.4   | Sediment | SU9008                                                   | Weeks et al., 1995                                                                                   |
| IBE        | 7.78   | 77.5    | Sediment | KET82-51                                                 | Guyodo & Valet 1996                                                                                  |
| IBE        | 4.73   | 103.58  | Sediment | DED87-07                                                 | Guyodo & Valet 1996                                                                                  |
| IBE        | -2.55  | 91.33   | Sediment | MD84-629                                                 | Guyodo & Valet 1996                                                                                  |
| IBE        | -1.42  | 90.32   | Sediment | MD85-668                                                 | Guyodo & Valet, 1996                                                                                 |
| IBE        | -1.52  | 90.7    | Sediment | MD85-669                                                 | Guyodo & Valet, 1996                                                                                 |
| IBE        | -8.38  | 112.57  | Sediment | MD85-674                                                 | Guyodo & Valet, 1996                                                                                 |
| IBE        | 9.9    | 121.53  | Sediment | ODP 768A                                                 | Guyodo & Valet, 1996                                                                                 |
| IBE        | 10.75  | 121.57  | Sediment | ODP 769B                                                 | Guyodo & Valet, 1996                                                                                 |
| IBE        | 39.37  | -26.61  | Sediment | SU-92-17                                                 | Lehman et al., 1996                                                                                  |
| IBE        | 37.79  | -27.23  | Sediment | SU-92-18                                                 | Lehman et al., 1996                                                                                  |
| IBE        | 37.3   | -27.09  | Sediment | SU-92-19                                                 | Lehman et al., 1996                                                                                  |
| IBE        | 44.68  | 168.23  | Sediment | ODP Site 884                                             | Roberts et al., 1997                                                                                 |
| IBE PFE ME | 60.4   | -23.6   | Sediment | ODP Site 983                                             | Channell et al., 1997; Knudsen et al., 2008; Christl et al., 2010                                    |
| IBE        | 32.97  | -76.28  | Sediment | ODP Site 1061                                            | ODP Leg 172 Scientific Party 1998                                                                    |
| IBE PFE ME | 32.98  | -76.23  | Sediment | ODP Site 1062                                            | ODP Leg 172 Scientific Party 1998                                                                    |
| IBE PFE ME | 33.68  | -57.62  | Sediment | ODP Site 1063                                            | ODP Leg 172 Scientific Party 1998; Knudsen et al., 2008; Christl et al., 2010; Channell et al., 2012 |
| IBE        | 58.21  | -48.37  | Sediment | HU90-013-013P                                            | Stoner et al., 1998                                                                                  |
| IBE        | 61.07  | -24.02  | Sediment | ODP Site 984                                             | Channell et al., 1999                                                                                |
| IBE        | -19.7  | 246.5   | Seafloor | East Pacific Rise (EPR)                                  | Gee et al., 2000                                                                                     |
| IBE        | -19.4  | 246.5   | Seafloor | East Pacific Rise (EPR)                                  | Gee et al., 2000                                                                                     |
| IBE PFE ME | 53.6   | 108.3   | Sediment | Lake Baikal                                              | Oda et al., 2002; Demory et al., 2004                                                                |
| IBE        | 55.5   | -14.7   | Sediment | ODP Site 980                                             | Channell & Raymo, 2003                                                                               |
| IBE PFE ME | -40.9  | 9.9     | Sediment | ODP Site 1089                                            | Stoner et al., 2003                                                                                  |
| IBE PFE ME | 37.8   | -10.6   | Sediment | MD95-2042                                                | Thouveny et al., 2004; Carcaillet et al., 2004                                                       |

|               |        |         |          |                           |                                                   |
|---------------|--------|---------|----------|---------------------------|---------------------------------------------------|
| IBE PFE<br>ME | 40.58  | -9.87   | Sediment | MD95-2040                 | Thouveny et al., 2004;<br>Carcaillet et al., 2004 |
| IBE PFE<br>ME | 62.67  | -37.46  | Sediment | ODP Site 919              | Channell et al., 2006                             |
| IBE           | 58.93  | -47.12  | Sediment | MD99-2242                 | Laj et al., 2006                                  |
| IBE           | 59.08  | -31.47  | Sediment | MD99-2247                 | Laj et al., 2006                                  |
| IBE           | 19.58  | 117.63  | Sediment | ODP Site 1145             | Laj et al., 2006                                  |
| IBE           | 16.45  | 116.27  | Sediment | ODP Site 1146             | Laj et al., 2006                                  |
| IBE PFE<br>ME | 57.19  | -47.13  | Sediment | JPC-18                    | Evans et al., 2007                                |
| IBE PFE<br>ME | 47.6   | -57.58  | Sediment | JPC-19                    | Evans et al., 2007                                |
| IBE           | 32.77  | 130.28  | Volcano  | Unzen Volcano             | Shibuya et al., 2007                              |
| IBE PFE<br>ME | 35.6   | -106.75 | Volcano  | Albuquerque Volcanoes, NM | Singer et al., 2008                               |
| IBE           | -50.2  | -45.7   | Sediment | IODP Site U1302/03        | Channell et al., 2014                             |
| IBE           | 58.24  | -45.64  | Sediment | IODP Site U1306           | Channell et al., 2014                             |
| IBE PFE<br>ME | -10.53 | 147.22  | Sediment | MD05-2930                 | Simon et al., 2016                                |
| IBE PFE<br>ME | -2.51  | 144.32  | Sediment | MD05-2920                 | Simon et al., 2016                                |
| IBE PFE<br>ME | -0.103 | -139.6  | Sediment | KR0515-PC1                | Yamazaki et al., 2008                             |
| IBE           | -77.5  | 39.4    | Ice core | Dome F                    | Horiuchi et al., 2016                             |
| IBE           | 2.77   | -110.57 | Sediment | ODP Site 851              | Valet et al., 2020                                |
| IBE           | 39.08  | -127.78 | Sediment | ODP 1021                  | Valet et al., 2024                                |

**Table S2: TALDICE  $^{10}\text{Be}$  concentrations over the last century**

| Top depth<br>/m | Bottom<br>depth /m | Mean<br>depth /m | Top age<br>/a CE | Bottom age<br>/a CE | Mean age<br>/a CE | $^{10}\text{Be}$ conc.<br>/at g $^{-1}$ | Uncertainty of<br>$^{10}\text{Be}$ conc. /at g $^{-1}$ |
|-----------------|--------------------|------------------|------------------|---------------------|-------------------|-----------------------------------------|--------------------------------------------------------|
| 4.5             | 5.0                | 4.8              | 1983.5           | 1980.7              | 1982.1            | 13193                                   | 575                                                    |
| 5.0             | 5.5                | 5.2              | 1980.7           | 1977.8              | 1979.3            | 22939                                   | 714                                                    |
| 5.5             | 6.0                | 5.7              | 1977.8           | 1975.0              | 1976.4            | 26440                                   | 831                                                    |
| 6.0             | 6.5                | 6.3              | 1974.8           | 1971.6              | 1973.2            | 17023                                   | 531                                                    |
| 6.5             | 7.0                | 6.8              | 1971.6           | 1968.9              | 1970.2            | 18894                                   | 670                                                    |
| 7.0             | 7.5                | 7.3              | 1968.8           | 1965.6              | 1967.2            | 17675                                   | 630                                                    |
| 7.5             | 8.0                | 7.8              | 1965.6           | 1962.9              | 1964.2            | 19577                                   | 612                                                    |
| 8.0             | 8.5                | 8.2              | 1962.8           | 1959.9              | 1961.4            | 13802                                   | 453                                                    |
| 8.5             | 9.0                | 8.7              | 1959.9           | 1956.8              | 1958.3            | 12714                                   | 398                                                    |
| 9.0             | 9.5                | 9.3              | 1956.8           | 1953.7              | 1955.3            | 21421                                   | 668                                                    |
| 9.5             | 10.0               | 9.7              | 1953.7           | 1950.7              | 1952.2            | 21526                                   | 672                                                    |
